# Supplementary material for: Facile Synthesis and Redox Behavior of an Overcrowded Spirogermabifluorene
Source: MDPI journal article supplement (doi:10.3390/inorganics9100075), 2021-10-06
Supplement: s1 [file s1]

Supporting Information for

**Facile Synthesis and Redox Behavior of an Overcrowded Spirogermabifluorene**

Shogo Morisako,<sup>1,2</sup> Kohsuke Noro,<sup>3</sup> and Takahiro Sasamori<sup>1,2,3\*</sup>

1. Division of Chemistry, Faculty of Pure and Applied Sciences, University of Tsukuba, 1-1-1 Tennoudai, Tsukuba, Ibaraki 305-8571, Japan.
2. Tsukuba Research Center for Energy Materials Sciences (TREMS), University of Tsukuba, 1-1-1 Tennoudai, Tsukuba, Ibaraki 305-8571, Japan.
3. Graduate School of Natural Sciences, Nagoya City University, Yamanohata 1, Mizuho-cho, Mizuho-ku, Nagoya, Aichi 467-8501, Japan.

E-mail: sasamori@chem.tsukuba.ac.jp

Tel, Fax: +81-29-853-4412

## Contents

|                                                                                                                    |    |
|--------------------------------------------------------------------------------------------------------------------|----|
| 1. $^1\text{H}$ and $^{13}\text{C}\{^1\text{H}\}$ NMR spectra of <b>1</b> and <b>5</b> in $\text{C}_6\text{D}_6$ . | S3 |
| 2. Computational calculations for the spirometallabifluorenes and the related species.                             | S5 |
| 3. UV/vis spectrum for intermediate <b>6</b> .                                                                     | S6 |
| 4. Crystallographic data of <b>1</b> and <b>5</b> .                                                                | S7 |
| 5. References                                                                                                      | S8 |

1.  $^1\text{H}$  and  $^{13}\text{C}\{^1\text{H}\}$  NMR spectra of **1** and **5** in  $\text{C}_6\text{D}_6$ .

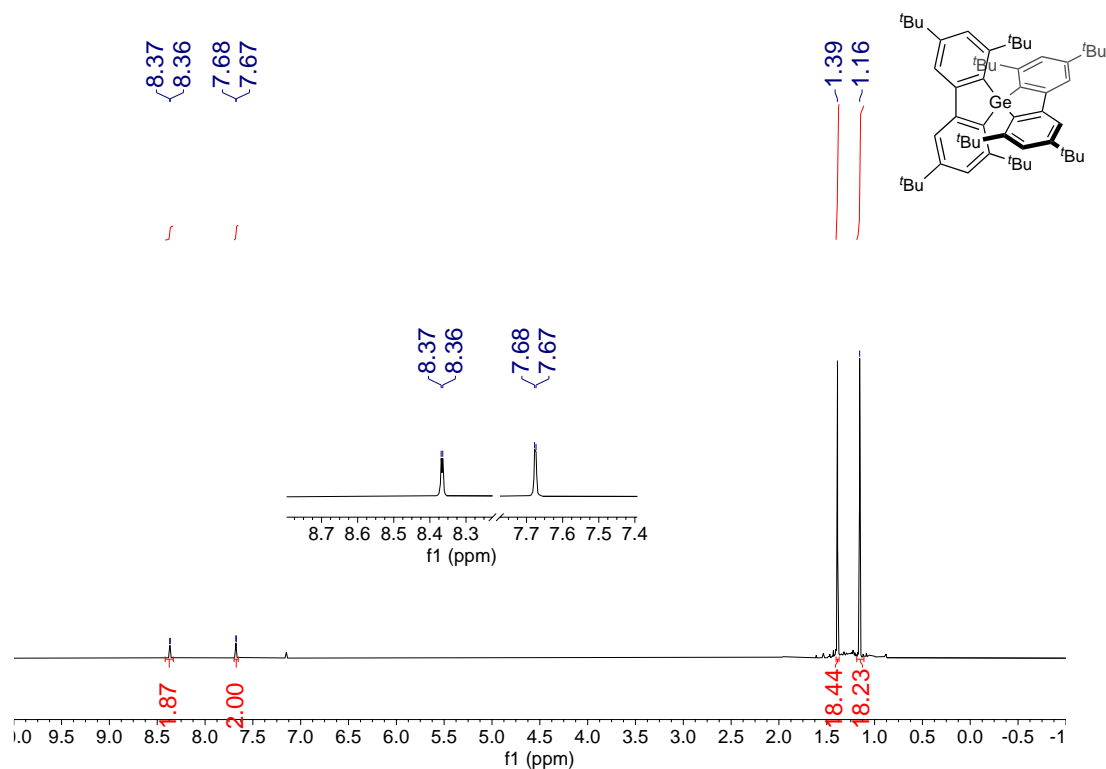

Figure S1.  $^1\text{H}$  NMR spectrum of **1** in  $\text{C}_6\text{D}_6$ .

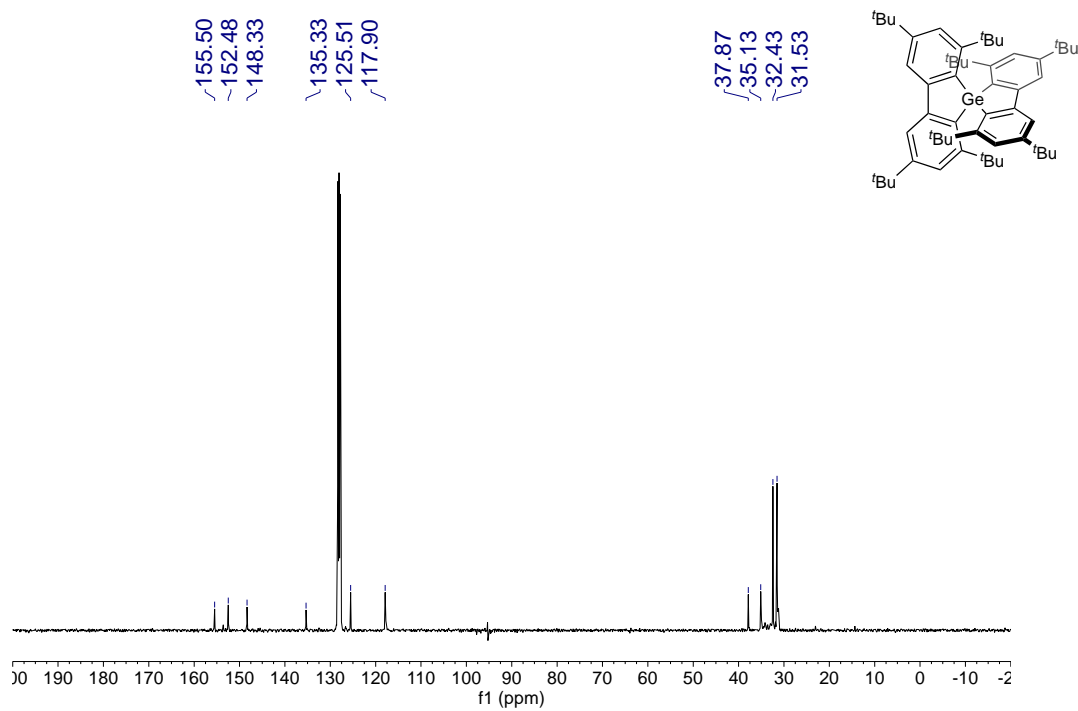

Figure S2.  $^{13}\text{C}\{^1\text{H}\}$  NMR spectrum of **1** in  $\text{C}_6\text{D}_6$ .

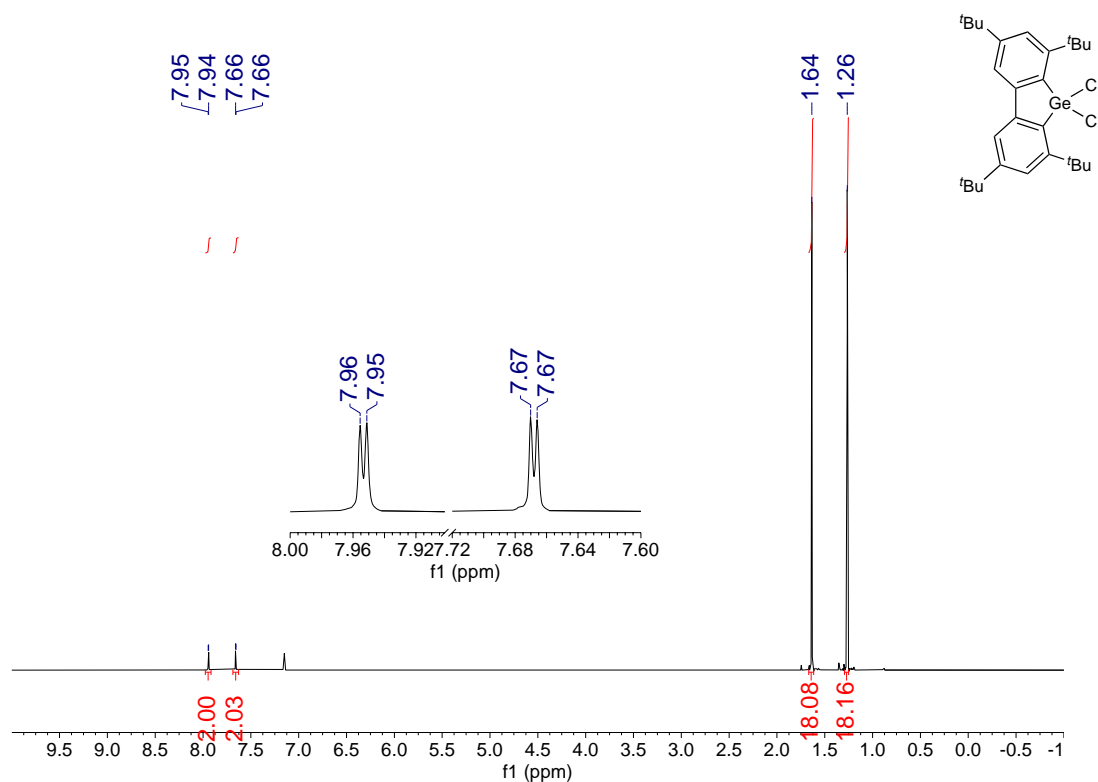

**Figure S3.** <sup>1</sup>H NMR spectrum of **5** in C<sub>6</sub>D<sub>6</sub>.

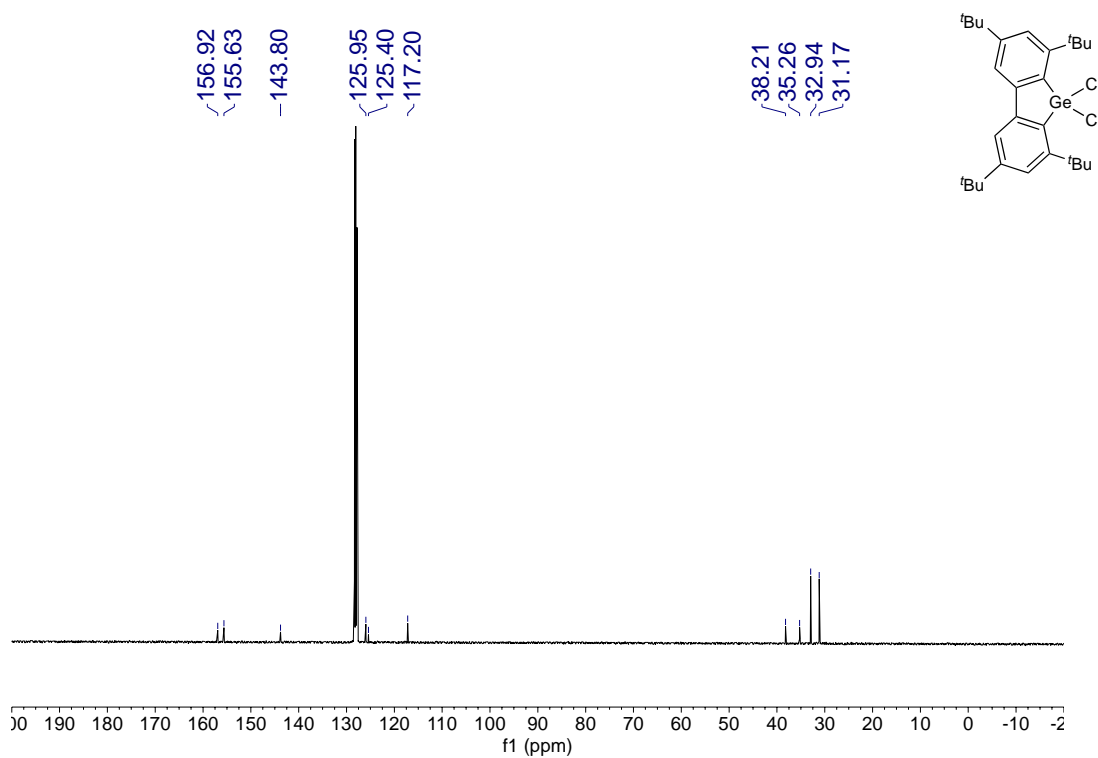

**Figure S4.** <sup>13</sup>C{<sup>1</sup>H} NMR spectrum of **5** in C<sub>6</sub>D<sub>6</sub>.

## 2. Computational calculations for the spirometallabifluorenes and the related species.

All calculations were carried out using the density functional theory (DFT) method with a pure B3PW91-D3(BJ) functional,<sup>[S1,S2]</sup> and geometry optimizations and vibrational frequencies were calculated in the gas phase using the 6-311G(2d,p) basis set, as implemented in the Gaussian 16 program package.<sup>[S3]</sup> The molecular geometries for the transition states were first estimated using the Reaction plus software package (software to optimize reaction paths along the user's expected ones; HPC Systems Inc., <http://www.hpc.co.jp/chem/react2.html>; written in Japanese), based on the nudged-elastic-band (NEB) method,<sup>[S3]</sup> and subsequently re-optimized using the *Gaussian 16* software package.<sup>[S4]</sup> Computational time was generously provided by the Supercomputer Laboratory at the Institute for Chemical Research (Kyoto University). The coordinates of the optimized structures are included in the corresponding .xyz files in the Supplementary Materials.

### 3. UV/vis spectrum for intermediate 6.

The UV/vis spectrum was recorded on a JASCO V-770. The supernatant of the reaction mixture of the *in-situ*-generated **4** and  $\text{GeCl}_2 \cdot (\text{dioxane})$  in  $\text{Et}_2\text{O}$  was transferred to a UV-cell under an argon atmosphere at  $-80\text{ }^\circ\text{C}$ . After the measurement under an argon atmosphere, the solution was exposed to air, and then measured under ambient atmosphere. The obtained differential spectrum is shown in Figure S5.

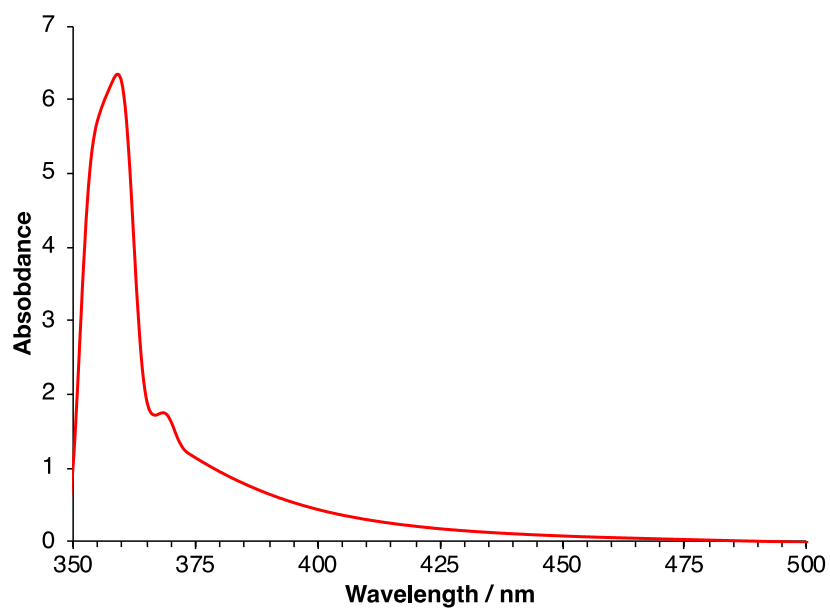

**Figure S5.** Differential UV/vis spectrum in  $\text{Et}_2\text{O}$ .

#### 4. Crystallographic data

**Table S1.** Crystal data and structural refinement data for **1** and **5**.

| Compound                                             | <b>1</b>                           | <b>5</b>                                                    |
|------------------------------------------------------|------------------------------------|-------------------------------------------------------------|
| Formula                                              | C <sub>56</sub> H <sub>80</sub> Ge | C <sub>28</sub> H <sub>40</sub> Cl <sub>2</sub> Ge          |
| Molecular Weight                                     | 825.79                             | 520.09                                                      |
| Temperature / °C                                     | −180                               | −170                                                        |
| $\lambda$ (Å)                                        | 0.71073                            | 0.71075                                                     |
| Crystal size / mm <sup>3</sup>                       | 0.10 x 0.10 x 0.08                 | 0.20 x 0.10 x 0.01                                          |
| Crystal system                                       | tetragonal                         | orthorhombic                                                |
| Space group                                          | <i>P</i> 4 <sub>1</sub> (#76)      | <i>P</i> 2 <sub>1</sub> 2 <sub>1</sub> 2 <sub>1</sub> (#19) |
| <i>a</i> / Å                                         | 11.0197(1)                         | 12.3031(2)                                                  |
| <i>b</i> / Å                                         | 11.0197(1)                         | 13.7729(2)                                                  |
| <i>c</i> / Å                                         | 39.7580(7)                         | 16.2300(3)                                                  |
| $\alpha$ / °                                         | 90                                 | 90                                                          |
| $\beta$ / °                                          | 90                                 | 90                                                          |
| $\gamma$ / °                                         | 90                                 | 90                                                          |
| <i>V</i> / Å <sup>3</sup>                            | 4827.96(12)                        | 2750.16(8)                                                  |
| <i>Z</i>                                             | 4                                  | 4                                                           |
| $\mu$ / mm <sup>−1</sup>                             | 0.669                              | 1.321                                                       |
| <i>D</i> <sub>calcd.</sub> / g·cm <sup>−3</sup>      | 1.136                              | 1.256                                                       |
| $\theta_{\text{max}}$                                | 26.483                             | 26.495                                                      |
| Refl./restr./param.                                  | 9991/1/563                         | 5655/0/323                                                  |
| Completeness                                         | 99.8                               | 99.1                                                        |
| GOF                                                  | 1.123                              | 1.137                                                       |
| <i>R</i> <sub>1</sub> ( <i>I</i> > 2σ( <i>I</i> ))   | 0.0542                             | 0.0291                                                      |
| w <i>R</i> <sub>2</sub> ( <i>I</i> > 2σ( <i>I</i> )) | 0.1239                             | 0.0691                                                      |
| <i>R</i> <sub>1</sub> (all data)                     | 0.0628                             | 0.0297                                                      |
| w <i>R</i> <sub>2</sub> (all data)                   | 0.1276                             | 0.0696                                                      |
| Largest diff. peak and hole / e·Å <sup>−3</sup>      | 1.595, −0.492                      | 0.358, −0.305                                               |
| CCDC number                                          | 2106926                            | 2106927                                                     |

## 5. References

- [S1] Tao, J.; Perdew, J. P.; Staroverov, V. N.; Scuseria, G. E. *Phys. Rev. Lett.* **2003**, *91*, 146401.
- [S2] Grimme, S.; Ehrlich, S.; Goerigk, L. *J. Comp. Chem.* **2011**, *32*, 1456-1465.
- [S3] Henkelman, G.; Jónsson, H., *J. Chem. Phys.* **2000**, *113*, 9978-9985.
- [S4] Gaussian 16, Revision C.01, Frisch, M. J.; Trucks, G. W.; Schlegel, H. B.; Scuseria, G. E.; Robb, M. A.; Cheeseman, J. R.; Scalmani, G.; Barone, V.; Petersson, G. A.; Nakatsuji, H.; Li, X.; Caricato, M.; Marenich, A. V.; Bloino, J.; Janesko, B. G.; Gomperts, R.; Mennucci, B.; Hratchian, H. P.; Ortiz, J. V.; Izmaylov, A. F.; Sonnenberg, J. L.; Williams-Young, D.; Ding, F.; Lipparini, F.; Egidi, F.; Goings, J.; Peng, B.; Petrone, A.; Henderson, T.; Ranasinghe, D.; Zakrzewski, V. G.; Gao, J.; Rega, N.; Zheng, G.; Liang, W.; Hada, M.; Ehara, M.; Toyota, K.; Fukuda, R.; Hasegawa, J.; Ishida, M.; Nakajima, T.; Honda, Y.; Kitao, O.; Nakai, H.; Vreven, T.; Throssell, K.; Montgomery, J. A., Jr.; Peralta, J. E.; Ogliaro, F.; Bearpark, M. J.; Heyd, J. J.; Brothers, E. N.; Kudin, K. N.; Staroverov, V. N.; Keith, T. A.; Kobayashi, R.; Normand, J.; Raghavachari, K.; Rendell, A. P.; Burant, J. C.; Iyengar, S. S.; Tomasi, J.; Cossi, M.; Millam, J. M.; Klene, M.; Adamo, C.; Cammi, R.; Ochterski, J. W.; Martin, R. L.; Morokuma, K.; Farkas, O.; Foresman, J. B.; Fox, D. J. Gaussian, Inc., Wallingford CT, 2016.
